# Supplementary material
Source: PubMed Central journal article supplement (PMC2556817)
Supplement: pp.108.125237_2.pdf [file pp.108.125237_2.pdf]

## Supplemental data 2

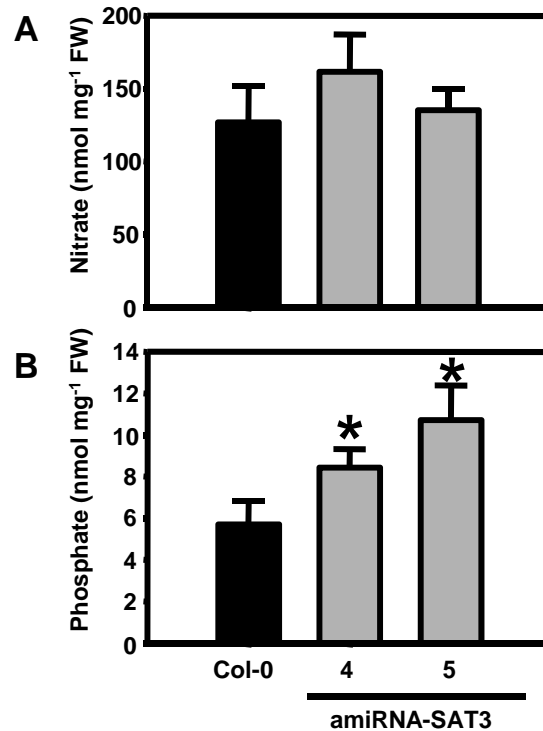

### Supplemental data 2: Nitrate and phosphate contents in leaves of wild type and transgenic Arabidopsis plants

Rosette leaves of three Arabidopsis wild type plants (black bars) and three individuals of each independent transgenic plant lines with reduced mitochondrial SAT activity (grey bars) were analyzed for Nitrate (A) and Phosphate (B) after extraction of metabolites with 0.1 M hydrochloric acid. Error bars indicate SD, and asterisks mark significant differences using the unpaired t-test.
