# Supplementary material
Source: PubMed Central journal article supplement (PMC2556817)
Supplement: pp.108.125237_3.pdf [file pp.108.125237_3.pdf]

## Supplemental data 3

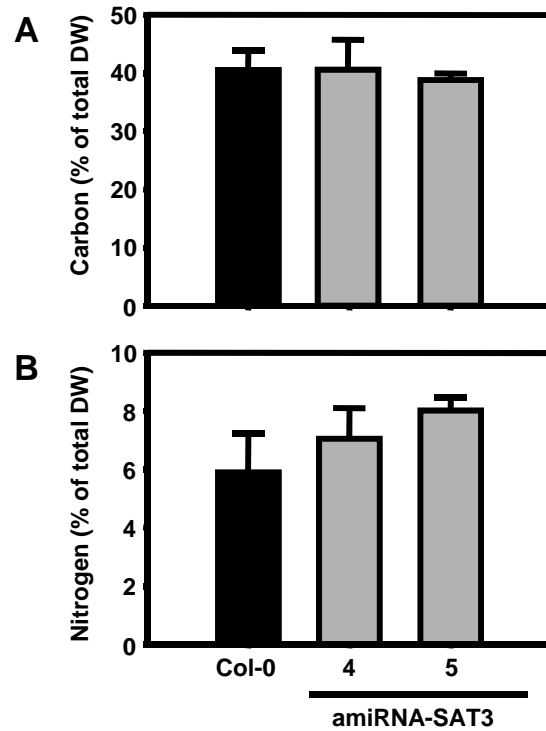

### Supplemental data 3: Carbon and nitrogen contents in leaves of wild type and transgenic *Arabidopsis* plants

Total Carbon (A) and Nitrogen (B) content of dried rosette leaves of eight week old wild type (black bars) and the transgenic amiRNA-SAT3 lines 4 and 5 (grey bars) were analysed by using an elemental-analysator (n = 4).
